# Supplementary material
Source: PubMed Central journal article supplement (PMC10046120)
Supplement: mmc1.pdf [file mmc1.pdf]

STable 1. Ophthalmological treatment protocol

| Corneal lesions | Membranes | Ophthalmic Treatment                                                                                                                                                                                                                                                                 | Systemic Treatment                                                                                                |
|-----------------|-----------|--------------------------------------------------------------------------------------------------------------------------------------------------------------------------------------------------------------------------------------------------------------------------------------|-------------------------------------------------------------------------------------------------------------------|
| No              | No        | Ocular washing<br>0.6% povidone iodine drops qid<br>Erythromycin ointment qid                                                                                                                                                                                                        | No                                                                                                                |
| No              | Yes       | Mechanical removal of membranes under topical anesthesia<br>Ocular washing<br>0.6% povidone iodine drops qid<br>Erythromycin ointment qid<br>Dexamethasone 1 drop (1mg/1ml) qid                                                                                                      | Tecovirimat 600 mg bid for 14 days if severely affected or with a torpid evolution                                |
| Yes             | No        | Ocular washing<br>0.6% povidone iodine drops qid<br>Erythromycin ointment qid when epithelial keratitis<br>Dexamethasone 1 drop (1mg/1ml) qid if corneal stromal keratitis, corneal endothelitis and/or anterior uveitis                                                             | Tecovirimat 600 mg bid for 14 days (Cidofovir, Brincidofovir*)                                                    |
| Yes             | Yes       | Mechanical removal of membranes under topical anesthesia<br>Ocular washing<br>0.6% povidone iodine drops qid<br>Erythromycin ointment qid when epithelial keratitis<br>Dexamethasone 1 drop (1mg/1ml) qid if corneal stromal keratitis, corneal endothelitis and/or anterior uveitis | Tecovirimat 600 mg bid for 14 days (Cidofovir, Brincidofovir*) plus a steroidal or nonsteroidal anti inflammatory |
