# Supplementary material
Source: PubMed Central journal article supplement (PMC10046120)
Supplement: mmc2.pdf [file mmc2.pdf]

| Patient No | Age (y)<br>Sex | Other comorbidities or coinfections<br>HIV/PrEP | Smallpox Vaccination | Possible transmission<br>Risk factors<br>MPX* | non-ocular symptoms                                            | Onset of ophthalmic manifestations | Affected eye | Eyelid               | Conjunctiva                                            | Cornea                                                                 | Conjunctiva DNA Samples total/positive<br>Days to negative<br>Cq first-last positive value | Local Ophthalmic Treatment                               | Systemic treatment                                                                            | Ophthalmological follow-up                                                                                                               |
|------------|----------------|-------------------------------------------------|----------------------|-----------------------------------------------|----------------------------------------------------------------|------------------------------------|--------------|----------------------|--------------------------------------------------------|------------------------------------------------------------------------|--------------------------------------------------------------------------------------------|----------------------------------------------------------|-----------------------------------------------------------------------------------------------|------------------------------------------------------------------------------------------------------------------------------------------|
| 1          | 24<br>Male     | Syphilis, Gonococcus<br><br>PrEP                | No                   | Sexual contact<br><br>ChemSex                 | Proctitis, genital lesions, Myalgia, Headache                  | 0 days                             | OU           | Papules, blepharitis | Non-membranous conjunctivitis                          | Epithelial ulcer, with thinning                                        | 9/4<br>43 days<br>18-40                                                                    | 0.6% povidone iodine, erythromycin ointment, lubrication | Doxycycline, Vit.C, Tecovirimat                                                               | Severe corneal thinning after 8 days. Improvement 1 week after tecovirimat, healed 1 month later with mild peripheral scarring           |
| 2          | 36<br>Male     | HIV                                             | No                   | Sexual contact                                | Fever, genital lesions, genital pain, fatigue, general malaise | 0 days                             | OS           | Papules, blepharitis | Membranous conjunctivitis, conjunctival focal erosions | Epithelial ulcer with thinning, stromal keratitis and anterior uveitis | 15/12<br>46 days<br>22-38                                                                  | 0.6% povidone iodine, erythromycin ointment, lubrication | Dexketoprofen, paracetamol, oral prednisone, amoxicillin/clavulanic acid 875/125. Tecovirimat | Corneal ulcer after oral steroids, then stromal edema and anterior uveitis with rapid improvement after tecovirimat and topical steroids |

|   |            |                                |     |                                  |                                                                               |        |    |                                                                        |                                                                                                    |                      |                                  |                                                                                                         |                                                                  |                                                                                                                                                                             |
|---|------------|--------------------------------|-----|----------------------------------|-------------------------------------------------------------------------------|--------|----|------------------------------------------------------------------------|----------------------------------------------------------------------------------------------------|----------------------|----------------------------------|---------------------------------------------------------------------------------------------------------|------------------------------------------------------------------|-----------------------------------------------------------------------------------------------------------------------------------------------------------------------------|
| 3 | 30<br>Male | Anemia<br>thalassemia<br>minor | No  | Sexual<br>Contact<br><br>ChemSex | Fever,<br>periocular<br>lesions,<br>genital<br>lesions,<br>trunk and<br>limbs | 0 days | OD | Papules,<br>blepharitis                                                | Severe<br>membrano<br>us<br>conjunctiv<br>itis,<br>extensive<br>conjunctiv<br>al focal<br>erosions | Not<br>affected      | 7/4<br><br>11 days<br><br>18-36  | 0.6%<br>povidone<br>iodine,<br>erythromycin<br>ointment,<br>dexamethason<br>e eye drops,<br>lubrication | oral<br>prednisone,<br>Tecovirimat                               | High risk of<br>symblepharon. Complete<br>clinical recovery 2 weeks<br>after tecovirimat.                                                                                   |
| 4 | 47<br>Male | None                           | Yes | Sexual<br>Contact<br><br>MPX     | genital<br>lesions,<br>odynopha<br>gia                                        | 0 days | OU | Not<br>affected                                                        | Non-membrano<br>us<br>conjunctiv<br>itis                                                           | Not<br>affected      | 1/1<br><br>NA<br><br>34          | 0.6%<br>povidone<br>iodine,<br>erythromycin<br>ointment,<br>dexamethason<br>e eye drops,<br>lubrication | No                                                               | Resolution in 3 days                                                                                                                                                        |
| 5 | 30<br>Male | Asthma<br><br>PrEP             | No  | Sexual<br>contact<br><br>ChemSex | oral<br>mucosa<br>and tongue<br>lesions,<br>fever                             | 5 days | OU | Papules,<br>blepharitis                                                | Non<br>membrano<br>us<br>conjunctiv<br>itis                                                        | Not<br>affected      | 3/1<br><br>NA<br><br>33          | 0.6%<br>povidone<br>iodine,<br>erythromycin<br>ointment,<br>dexamethason<br>e eye drops,<br>lubrication | Ibuprofen,<br>paracetamol                                        | Resolution after 1 week                                                                                                                                                     |
| 6 | 46<br>Male | None                           | No  | Sexual<br>Contact<br><br>MPX     | Chest<br>pustule,<br>two peri-<br>rectal<br>papula                            | 0 days | OS | Severe<br>eyelid<br>edema,<br>blepharitis<br>, preseptal<br>cellulitis | Membrano<br>us<br>conjunctiv<br>itis                                                               | Epithelial<br>ulcers | 11/9<br><br>18 days<br><br>16-36 | 0.6%<br>povidone<br>iodine,<br>erythromycin<br>ointment,<br>dexamethason                                | Oral<br>prednisone,<br>ibuprofen,<br>paracetamol,<br>Tecovirimat | 3 days after conjunctivitis<br>he developed a preseptal<br>cellulitis. Improvement<br>after 10 days, but then<br>corneal involvement.<br>Complete resolution in 1<br>month. |

|   |            |     |     |                                 |                                  |         |    |                 |                            |                                                                                                |                                |                                                                                                         |                                          |                                                                                                                                             |
|---|------------|-----|-----|---------------------------------|----------------------------------|---------|----|-----------------|----------------------------|------------------------------------------------------------------------------------------------|--------------------------------|---------------------------------------------------------------------------------------------------------|------------------------------------------|---------------------------------------------------------------------------------------------------------------------------------------------|
|   |            |     |     |                                 |                                  |         |    |                 |                            |                                                                                                |                                | e eye drops,<br>lubrication                                                                             |                                          |                                                                                                                                             |
| 7 | 54<br>Male | HSV | Yes | Sexual<br>Contact<br><br>MPX    | Genital<br>lesions               | 0 days  | OD | Not<br>affected | Mild<br>conjunctiv<br>itis | Not<br>affected                                                                                | 1/0<br><br>NA<br><br>NA        | 0.6%<br>povidone<br>iodine,<br>erythromycin<br>ointment,<br>dexamethason<br>e eye drops,<br>lubrication | Ibuprofen,<br>paracetamol<br>(if needed) | Resolution after 1 week                                                                                                                     |
| 8 | 48<br>Male | HIV | No  | Sexual<br>contact               | Facial and<br>genital<br>lesions | 0 days  | OS | Not<br>affected | Mild<br>conjunctiv<br>itis | Not<br>affected                                                                                | 4/3<br><br>7 days<br><br>27-34 | 0.6%<br>povidone<br>iodine,<br>erythromycin<br>ointment,<br>lubrication                                 | oral<br>prednisone                       | Resolution after 10 days                                                                                                                    |
| 9 | 35<br>Male |     | No  | No sexual<br>contact<br><br>MPX | Skin<br>lesion                   | 6 weeks | OS | Not<br>affected | Mild<br>conjunctiv<br>itis | Epithelial<br>ulcer<br><br>Stromal<br>keratitis,<br>endothelitis<br>and<br>corneal<br>scarring | 4/3<br><br>NA<br><br>39**      | 0.6%<br>povidone<br>iodine,<br>erythromycin<br>ointment,<br>dexamethason<br>e eye drops,<br>lubrication | Tecovirimat                              | Previously seen in another<br>center with poor response.<br>Significant improvement<br>after 4 days of tecovirimat<br>and topical steroids. |
